# Supplementary material for: Associations between previous cesarean section and maternal and neonatal complications: the modification of long inter-pregnancy interval
Source: publisher site journal article supplement (doi:10.1515/jpm-2025-0280), 2025-11-17
Supplement: Supplementary file 1 [file j_jpm-2025-0280_suppl_001.docx]

Supplementary materials:

Table S1. Stratified analysis to analyze for the associations between previous cesarean section and adverse maternal and neonatal outcomes in subgroups with different inter-pregnancy intervals.

| Outcomes | Inter-pregnancy intervals <60 months  N=3,665 | | *P* value | Inter-pregnancy intervals≥60 months  N=3,702 | | *P* value |
| --- | --- | --- | --- | --- | --- | --- |
|  | previous vaginal delivery | previous cesarean section delivery |  | previous vaginal delivery | previous cesarean section delivery |  |
| uterine-related complicationsa | 74 (5.55) | 199 (8.57) |  | 67 (5.11) | 200 (8.36) |  |
| OR (95% CI) | 1 | 1.61 (1.22 - 2.13) | <0.01 | 1 | 1.69 (1.28 - 2.26) | <0.01 |
| aOR (95% CI) | 1 | 1.62 (1.03 - 2.55) | 0.03 | 1 | 1.94 (1.30 - 2.90) | <0.01 |
| placental-related complicationsb | 101 (7.50) | 174 (7.50) |  | 116 (8.84) | 222 (9.28) |  |
| OR (95% CI) | 1 | 0.99 (0.77 - 1.28) | 0.99 | 1 | 1.05 (0.83 - 1.33) | 0.65 |
| aOR (95% CI) | 1 | 0.71 (0.53 - 0.94) | 0.02 | 1 | 1.05 (0.82 - 1.36) | 0.66 |
| premature rupture of membranesb | 203 (15.01) | 353 (15.20) |  | 229 (17.46) | 378 (15.80) |  |
| OR (95% CI) | 1 | 1.00 (0.82 - 1.21) | 0.92 |  | 0.88 (0.74 -1.06) | 0.19 |
| aOR (95% CI) | 1 | 0.97 (0.88 - 1.02) | 0.26 | 1 | 0.87 (0.72 - 1.05) | 0.17 |
| small for gestational ageb | 77 (5.72) | 123 (5.30) |  | 117 (8.92) | 143 (5.98) |  |
| OR (95% CI) | 1 | 0.92 (0.64 - 1.24) | 0.58 | 1 | 0.64 (0.50 - 0.83) | <0.01 |
| aOR (95% CI) | 1 | 0.97 (0.66 - 1.42) | 0.89 | 1 | 0.72 (0.53 - 0.97) | 0.03 |
| preterm birthb | 249 (18.51) | 383 (16.50) |  | 312 (23.79) | 413 (17.27) |  |
| OR (95% CI) | 1 | 0.87 (0.73 - 1.03) | 0.12 | 1 | 0.66 (0.58 - 0.78) | <0.01 |
| aOR (95% CI) | 1 | 0.78 (0.62 - 0.97) | 0.03 | 1 | 0.65 (0.54 - 0.79) | <0.01 |
| severe neonatal adverse outcomesc | 173 (12.86) | 191 (8.23) |  | 226 (17.23) | 210 (8.87) |  |
| OR (95% CI) | 1 | 0.60 (0.48 - 0.75) | <0.01 | 1 | 0.46 (0.37 - 0.56) | <0.01 |
| aOR (95% CI) | 1 | 0.60 (0.42 - 0.94) | 0.02 | 1 | 0.52 (0.36 - 0.73) | <0.01 |

potential covariates included maternal age of the current delivery, gravidity (2, 3, >3), parity (2, >2), body mass index, abortion history (yes/no) and plus:

amode of the current delivery (vaginal/cesarean), gestational diabetes mellitus (yes/no), hypertensive disorders in pregnancy (yes/no).

bgestational diabetes mellitus (yes/no), hypertensive disorders in pregnancy (yes/no).

cgestational diabetes mellitus (yes/no), hypertensive disorders in pregnancy (yes/no), mode of the current delivery (vaginal/cesarean), gestational age, birth weight

Table S2. Population attributable risk percent of the previous cesarean section on adverse maternal and neonatal perinatal outcomes.

| Adverse maternal and neonatal perinatal outcomes | Exposure | Population attributable risk percent |
| --- | --- | --- |
| uterine-related complications | previous cesarean section | 27.59% |
| placental-related complication | 1.80% |
| premature rupture of membranes | -3.04% |
| small for gestational age | -16.98% |
| preterm birth | -14.72% |
| severe neonatal adverse outcome | -38.43% |

Table S3. Stratified analysis to analyze for the associations between previous cesarean section and adverse maternal and neonatal outcomes in subgroups with different maternal ages.

| year | maternal age <30 years | | maternal age 30-34 years | | maternal age ≥35years | |
| --- | --- | --- | --- | --- | --- | --- |
|  | previous vaginal delivery | previous cesarean section delivery | previous vaginal delivery | previous cesarean section delivery | previous vaginal delivery | previous cesarean section delivery |
| uterine-related complicationsa | 56 (6.00) | 138 (8.30) | 48 (5.11) | 144 (8.36) | 37 (4.73) | 117 (8.83) |
| OR (95% CI) | 1 | 1.41 (1.02 - 1.95) | 1 | 1.69 (1.21 - 2.37) | 1 | 1.95 (1.33 - 2.85) |
| aOR (95% CI) | 1 | 1.24 (0.76 - 2.00) | 1 | 1.96 (1.16 - 3.29) | 1 | 2.40 (1.39 - 4.14) |
| placental-related complicationsb | 80 (8.57) | 144 (8.66) | 58 (6.17) | 128 (7.43) | 79 (10.10) | 124 (9.36) |
| OR (95% CI) | 1 | 1.01 (0.76 - 1.34) | 1 | 1.22 (0.88 - 1.68) | 1 | 0.91 (0.68 - 1.23) |
| aOR (95% CI) | 1 | 1.01 (0.73 - 1.40) | 1 | 1.22 (0.86 - 1.73) | 1 | 0.86 (0.61 - 1.21) |
| premature rupture of membranesb | 147 (15.74) | 247 (14.85) | 163 (17.34) | 292 (16.95) | 122 (15.60) | 199 (14.49) |
| OR (95% CI) | 1 | 0.35 (0.28 - 0.44) | 1 | 0.47 (0.38 - 0.58) | 1 | 0.44 (0.35 - 0.56) |
| aOR (95% CI) | 1 | 0.86 (0.67 - 1.09) | 1 | 1.01 (0.81 - 1.26) | 1 | 0.88 (0.67 - 1.15) |
| small for gestational ageb | 73 (7.82) | 96 (5.77) | 47 (5.00) | 108 (6.27) | 74 (9.46) | 62 (4.68) |
| OR (95% CI) | 1 | 0.72 (0.52 - 0.99) | 1 | 1.27 (0.89 - 1.80) | 1 | 0.47 (0.33 - 0.66) |
| aOR (95% CI) | 1 | 0.77 (0.53 - 1.12) | 1 | 1.17 (0.77 - 1.79) | 1 | 1.03 (0.57 - 1.85) |
| preterm birthb | 239 (25.59) | 321 (19.30) | 156 (16.60) | 271 (15.73) | 166 (21.23) | 204 (15.40) |
| OR (95% CI) | 1 | 0.69 (0.57 - 0.84) | 1 | 0.93 (0.75 - 1.16) | 1 | 0.67 (0.53 - 0.84) |
| aOR (95% CI) | 1 | 0.72 (0.57 - 0.90) | 1 | 0.82 (0.64 - 1.05) | 1 | 0.77 (0.58 - 1.03) |
| severe neonatal adverse outcomesc | 166 (17.77) | 162 (9.74) | 116 (12.34) | 149 (8.65) | 117 (14.96) | 90 (6.79) |
| OR (95% CI) | 1 | 0.49 (0.39 - 0.63) | 1 | 0.67 (0.52 - 0.86) | 1 | 0.41 (0.31 - 0.55) |
| aOR (95% CI) | 1 | 0.52 (0.34 - 0.80) | 1 | 0.70 (0.43 - 1.13) | 1 | 0.69 (0.41 - 1.15) |

potential covariates included gravidity (2, 3, >3), parity (2, > 2), body mass index, inter-pregnancy interval, abortion history (yes/no) and plus:

amode of the current delivery (vaginal/cesarean), gestational diabetes mellitus (yes/no), hypertensive disorders in pregnancy (yes/no)

bgestational diabetes mellitus (yes/no), hypertensive disorders in pregnancy (yes/no)

cgestational diabetes mellitus (yes/no), hypertensive disorders in pregnancy (yes/no), mode of the current delivery (vaginal/cesarean), gestational age, birth weight

Table S5. Measures for estimation of the biological interaction between the advanced maternal age (≥ 35 years) and previous cesarean section delivery for the risks of adverse maternal and neonatal perinatal outcomes.

| Adverse maternal and neonatal perinatal outcomes | RERI (95%CI) | AP (95%CI) |
| --- | --- | --- |
| uterine-related complicationsa | 0.40 (-0.05, 0.86) | 0.25 (-0.02, 0.53) |
| placental-related complicationsb | -0.07 (-0.48, 0.33) | -0.16 (-1.06, 0.72) |
| premature rupture of membranesb | -0.02 (-0.30, 0.25) | -0.03 (-0.38, 0.32) |
| small for gestational ageb | -0.16 (-0.64, 0.31) | -0.22 (-0.87, 0.42) |
| preterm birthb | 0.10 (-0.12, 0.33) | 0.16 (-0.19, 0.52) |
| severe neonatal adverse outcomesc | 0.09 (-0.25, 0.43) | 0.20 (-0.57, 0.98) |

RERI=relative excess risk caused by interaction; AP=attributable proportion

The reference group is the group with both the normal maternal age (＜35 years) and previous vaginal delivery.

potential covariates included gravidity (2, 3, >3), parity (2, >2), body mass index, inter-pregnancy interval, abortion history (yes/no) and plus:

amode of the current delivery (vaginal/cesarean), gestational diabetes mellitus (yes/no), hypertensive disorders in pregnancy (yes/no)

bgestational diabetes mellitus (yes/no), hypertensive disorders in pregnancy (yes/no)

cgestational diabetes mellitus (yes/no), hypertensive disorders in pregnancy (yes/no), mode of the current delivery (vaginal/cesarean), gestational age, birth weight

Table S6. Logistic regression analysis for adverse maternal and neonatal outcomes associated with previous cesarean section after propensity score matching.

|  | Previous vaginal delivery  N=2,409 | Previous cesarean section delivery  N=2,409 |
| --- | --- | --- |
| uterine-related complicationsa |  |  |
| n/N (%) | 131 (5.44) | 204 (8.47) |
| aOR (95% CI) | Ref | 1.60 (1.28-2.01) |
| placental-related complicationsb |  |  |
| n/N (%) | 184 (7.64) | 196 (8.14) |
| aOR (95% CI) | Ref | 1.07 (0.86-1.32) |
| premature rupture of membranesb |  |  |
| n/N (%) | 399 (16.56) | 395 (16.40) |
| aOR (95% CI) | Ref | 0.98 (0.84 - 1.15) |
| small for gestational ageb |  |  |
| n/N (%) | 146 (6.06) | 126 (5.23) |
| aOR (95% CI) | Ref | 0.85 (0.66-1.09) |
| preterm birthb |  |  |
| n/N (%) | 438 (18.18) | 379 (15.73) |
| aOR (95% CI) | Ref | 0.84 (0.72-0.97) |
| severe neonatal adverse outcomesc |  |  |
| n/N (%) | 293 (12.16) | 145 (6.02) |
| aOR (95% CI) | Ref | 0.41 (0.32-0.53) |

potential covariates list

amode of the current delivery (vaginal/cesarean), gestational diabetes mellitus (yes/no), hypertensive disorders in pregnancy (yes/no)

bgestational diabetes mellitus (yes/no), hypertensive disorders in pregnancy (yes/no)

cgestational diabetes mellitus (yes/no), hypertensive disorders in pregnancy (yes/no), mode of the current delivery (vaginal/cesarean), gestational age, birth weight
